# Supplementary material for: The UVA response of enolic dibenzoylmethane: beyond the static approach
Source: Royal Society of Chemistry journal article supplement (doi:10.1039/c9pp00005d), 2019-03-14

# The UVA response of enolic dibenzoylmethane: Beyond the static approach

Marko Kojić<sup>1</sup>, Igor Lyskov<sup>2</sup>, Branislav Milovanović<sup>1</sup>, Christel M. Marian<sup>3</sup> and Mihajlo Etinski<sup>\*1</sup>

<sup>1</sup>Faculty of Physical Chemistry, University of Belgrade, Studentski trg 12-16 11000 Belgrade, Serbia

<sup>2</sup>Chemical and Quantum Physics Group, ARC Centre of Excellence in Exciton Science, School of Science, RMIT University, Melbourne, 3000, Australia

<sup>3</sup>Institute of Theoretical and Computational Chemistry, Heinrich Heine University Düsseldorf, Universitätsstr. 1, D-40225 Düsseldorf, Germany

\*To whom correspondence should be addressed; E-mail: [etinski@ffh.bg.ac.rs](mailto:etinski@ffh.bg.ac.rs)

Supporting Information

Figure S1: Molar excitation coefficient of  $\pi\pi^*$  (black line) and  $n\pi^*$  (red line) states simulated by employing the classical (a) and quantum (b) computational protocols with 150 (full line), 100 (dashed line) and 50 (dotted line) points.

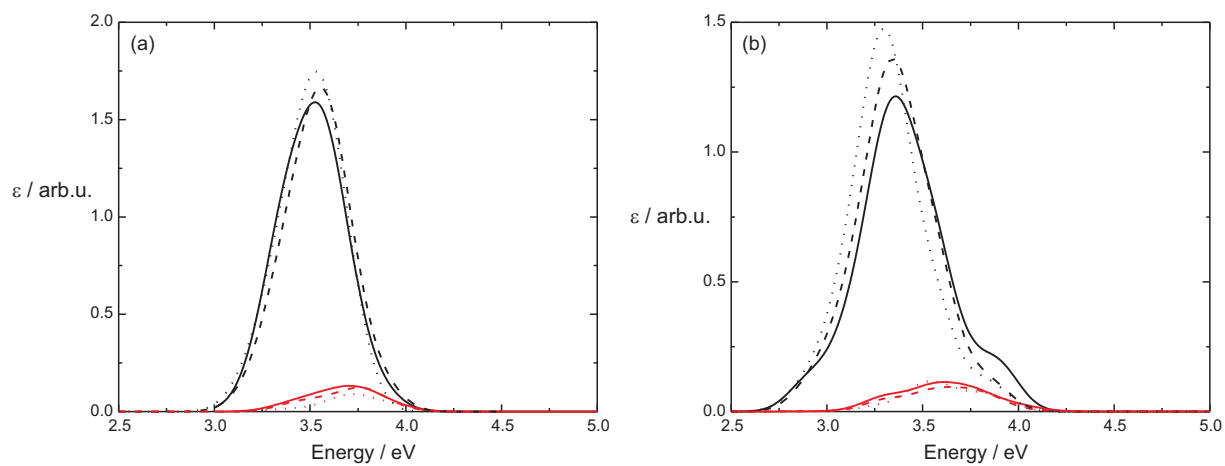

Figure S2: Correlation between the  $\pi\pi^*$  excitation energies and the  $\Delta(OH)$  coordinates sampled in the classical simulation. The Pearson correlation coefficient is 0.141.

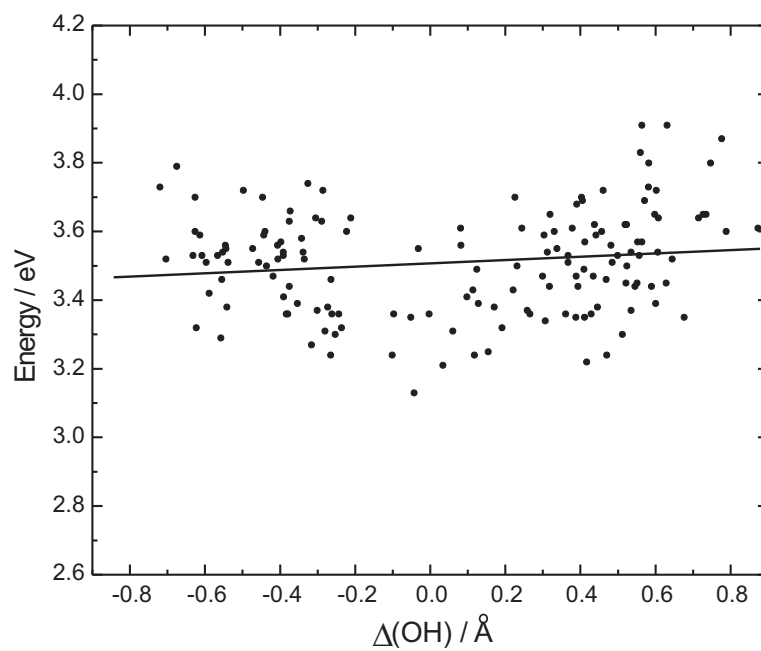

Figure S3: Correlation between the  $\pi\pi^*$  excitation energies and the  $d(CO)$  coordinate sampled in the classical simulation. The  $d(CO)$  coordinate is a sum of two C-O bonds. The Pearson correlation coefficient is -0.274.

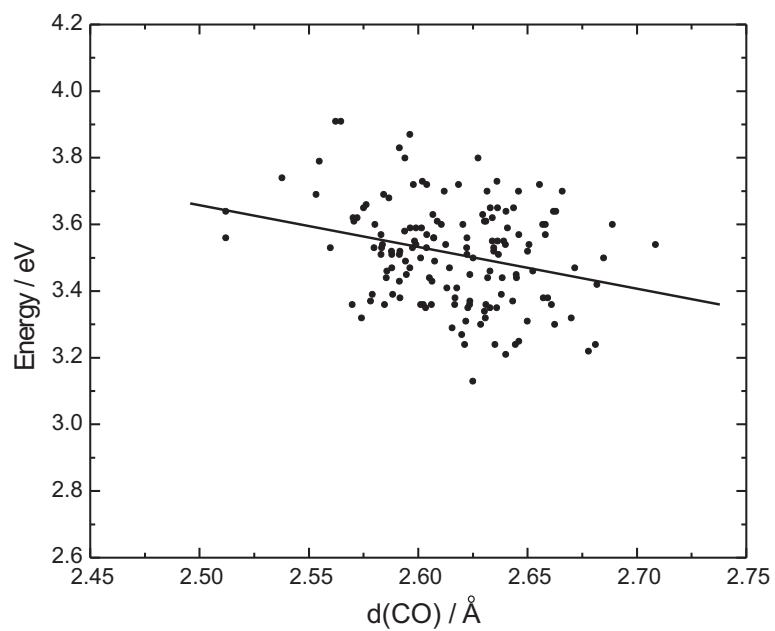

Figure S4: Correlation between the  $\pi\pi^*$  excitation energies and the  $d(C10 - C11)$  coordinates sampled in the classical simulation. The Pearson correlation coefficient is -0.068.

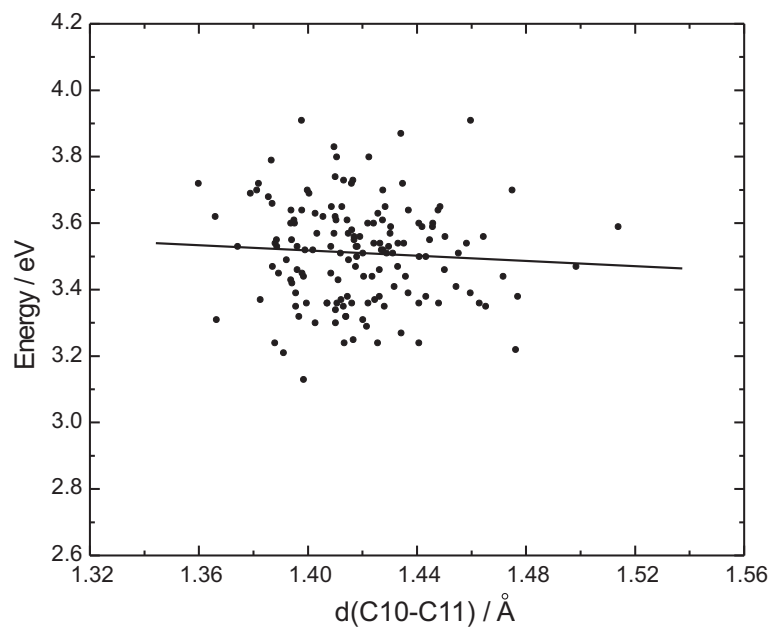

Figure S5: Correlation between the  $\pi\pi^*$  excitation energies and the C1-C2-C3 angles sampled in the classical simulation. The Pearson correlation coefficient is -0.005.

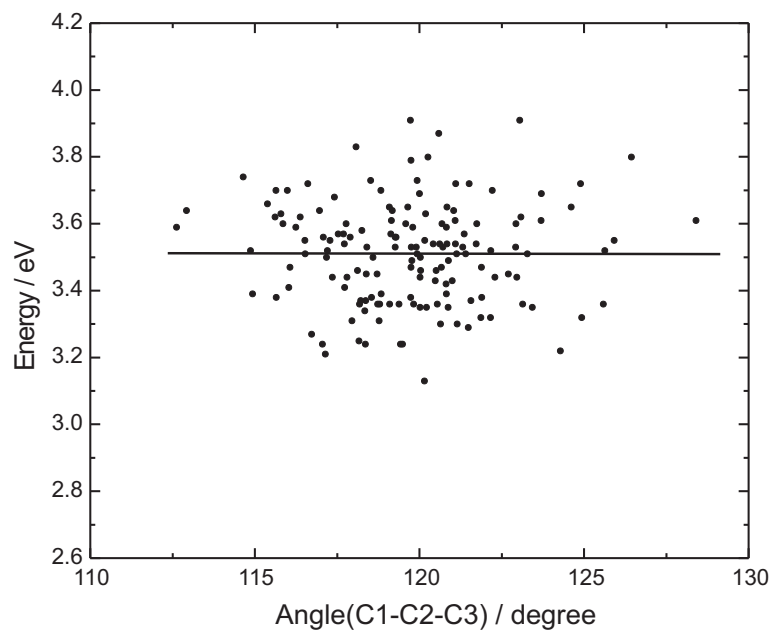

Figure S6: Correlation between the  $\pi\pi^*$  excitation energies and the C11-C10-C1-C2 dihedral angles sampled in the classical simulation. The Pearson correlation coefficient is -0.033.

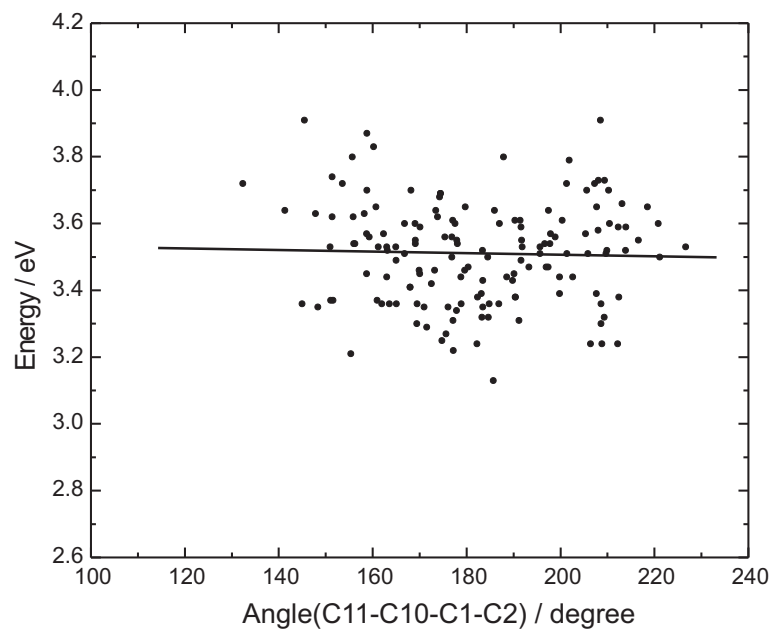

Figure S7: Correlation between the  $\pi\pi^*$  excitation energies and the H-O1-C1-C2 dihedral angles sampled in the classical simulation. The Pearson correlation coefficient is -0.101.

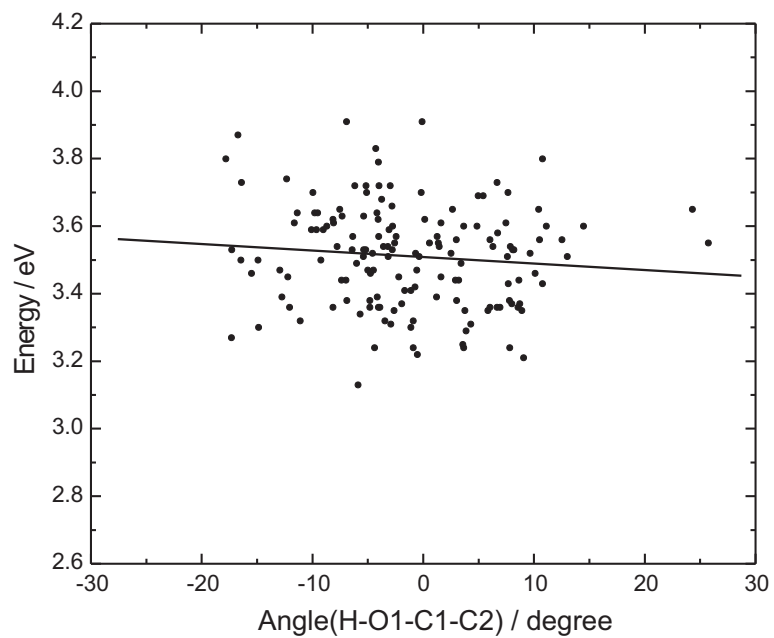

Supplement: c9pp00005d1.pdf [file c9pp00005d1.pdf]
